# Supplementary material
Source: Springer Nature journal article supplement (https://www.springermedizin.de/resource/supplementary/12958_2006_337_MOESM3_ESM.pdf/9567654)

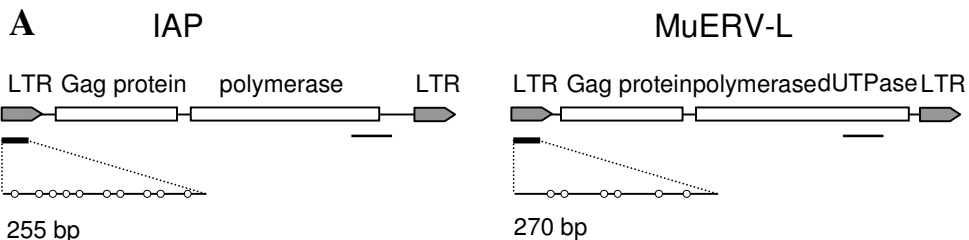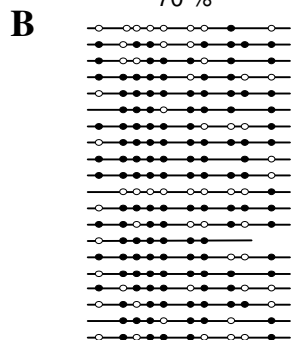

R1p27, ES cells that produce chimeric mice with kinky tail

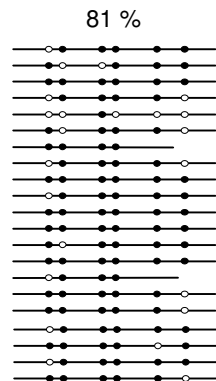

R1p16, ES cells that produce normal chimeric mice

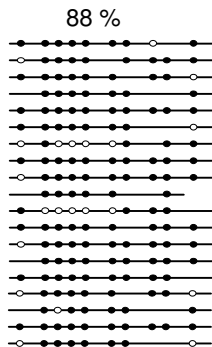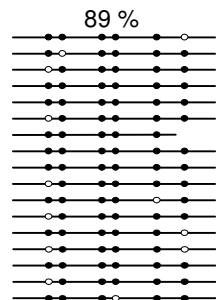

Supplement: MOESM3 [file 9567654]
